# Supplementary material
Source: MDPI journal article supplement (https://www.mdpi.com/2073-4395/13/7/1831)
Supplement: s1 [file s1]

**Table S1.** Tolerance Index (TI) and membership function value (MFV) for trait root length, germination percentage and survival percentage.

| S.no. | Genotypes                               | RLTI | GPTI | SPTI | MFVRL | MFVGP | MFVSP | mean MFV |
|-------|-----------------------------------------|------|------|------|-------|-------|-------|----------|
| 1     | <i>Biscutella didyma</i>                | 0.22 | 0.38 | 0.36 | 0.59  | 0.50  | 0.37  | 0.48     |
| 2     | <i>Brassica carinata</i> (PC-6)         | 0.08 | 0.57 | 0.57 | 0.07  | 0.83  | 0.85  | 0.59     |
| 3     | <i>Brassica fruticulosa</i> (Spain)     | 0.24 | 0.45 | 0.21 | 0.64  | 0.63  | 0.03  | 0.44     |
| 4     | <i>Brassica juncea</i> (Pusa Jaikisan)  | 0.10 | 0.50 | 0.50 | 0.14  | 0.71  | 0.70  | 0.52     |
| 5     | <i>Brassica napus</i> (GSC 6)           | 0.06 | 0.47 | 0.47 | 0.01  | 0.65  | 0.62  | 0.43     |
| 6     | <i>Brassica nigra</i> (EC472708)        | 0.11 | 0.60 | 0.40 | 0.17  | 0.89  | 0.47  | 0.51     |
| 7     | <i>Brassica rapa</i> (NRCPB rapa 8)     | 0.10 | 0.60 | 0.63 | 0.15  | 0.90  | 1.01  | 0.68     |
| 8     | <i>Brassica tournefortii</i> (Rawa)     | 0.20 | 0.31 | 0.40 | 0.48  | 0.38  | 0.47  | 0.44     |
| 9     | <i>Brassica tournefortii</i> (RBT 2002) | 0.24 | 0.47 | 0.20 | 0.66  | 0.67  | 0.00  | 0.44     |
| 10    | <i>Camelina sativa</i>                  | 0.22 | 0.38 | 0.36 | 0.57  | 0.50  | 0.37  | 0.48     |
| 11    | <i>Crambe abyssinica</i> (EC400058)     | 0.09 | 0.63 | 0.51 | 0.09  | 0.95  | 0.72  | 0.59     |
| 12    | <i>Crambe abyssinica</i> (EC694145)     | 0.07 | 0.66 | 0.52 | 0.03  | 1.01  | 0.74  | 0.59     |
| 13    | <i>Diplotaxis catholica</i>             | 0.34 | 0.15 | 0.20 | 1.01  | 0.09  | 0.00  | 0.37     |
| 14    | <i>Diplotaxis gomez-campoi</i>          | 0.23 | 0.40 | 0.28 | 0.61  | 0.54  | 0.19  | 0.44     |
| 15    | <i>Diplotaxis muralis</i>               | 0.29 | 0.10 | 0.30 | 0.82  | 0.00  | 0.23  | 0.35     |
| 16    | <i>Enarthrocarpus lyratus</i>           | 0.15 | 0.27 | 0.37 | 0.32  | 0.30  | 0.40  | 0.34     |
| 17    | <i>Eruca sativa</i> (IC57706)           | 0.07 | 0.50 | 0.53 | 0.03  | 0.72  | 0.77  | 0.51     |
| 18    | <i>Lepidium sativum</i>                 | 0.10 | 0.60 | 0.47 | 0.15  | 0.89  | 0.62  | 0.55     |
| 19    | Oxycamp                                 | 0.08 | 0.43 | 0.53 | 0.08  | 0.60  | 0.78  | 0.48     |
| 20    | <i>Sinapis alba</i>                     | 0.10 | 0.40 | 0.50 | 0.15  | 0.54  | 0.70  | 0.46     |

RL= Root length, GP= Germination percentage, SP= Survival percentage, TI= Tolerance Index, MFV= Membership function value
